# Supplementary material for: Comparative Study of Plastomes in Solanum tuberosum with Different Cytoplasm Types
Source: MDPI journal article supplement (doi:10.3390/plants12233995), 2023-11-28
Supplement: s1 [file s1]

Table S2. Repetitive element content in plastomes of *S. tuberosum* accessions

|                                                 | <b>Plastome<br/>Length,<br/>bp</b> | <b>Total<br/>Repeats<br/>Number</b> | <b>Total<br/>Repeats<br/>Length, bp</b> | <b>% of<br/>Plastome<br/>Length</b> | <b>Number of<br/>repeats with<br/>all subunits<br/>inside gene<br/>sequences</b> | <b>Number of<br/>repeats with<br/>all subunits<br/>outside gene<br/>sequences</b> |
|-------------------------------------------------|------------------------------------|-------------------------------------|-----------------------------------------|-------------------------------------|----------------------------------------------------------------------------------|-----------------------------------------------------------------------------------|
| <b>Species</b>                                  |                                    |                                     |                                         |                                     |                                                                                  |                                                                                   |
| <i>S. tuberosum</i> Group Tuberosum <b>W</b>    | 155549                             | 11                                  | 628                                     | 0,4037                              | 4                                                                                | 4                                                                                 |
| <i>S. tuberosum</i> Group Tuberosum <b>T</b>    | 155296                             | 12                                  | 685                                     | 0,4411                              | 5                                                                                | 4                                                                                 |
| <i>S. tuberosum</i> Group Phureja <b>P</b>      | 155492                             | 12                                  | 685                                     | 0,4405                              | 5                                                                                | 4                                                                                 |
| <i>S. tuberosum</i> Group Andigenum a3 <b>A</b> | 155518                             | 13                                  | 727                                     | 0,4675                              | 5                                                                                | 4                                                                                 |
| <i>S. tuberosum</i> Group Andigenum a4 <b>A</b> | 155517                             | 13                                  | 727                                     | 0,4675                              | 5                                                                                | 4                                                                                 |
| <i>S. tuberosum</i> Group Tuberosum <b>D</b>    | 155562                             | 11                                  | 658                                     | 0,423                               | 4                                                                                | 4                                                                                 |
