# Supplementary material for: Comparative Study of Plastomes in Solanum tuberosum with Different Cytoplasm Types
Source: MDPI journal article supplement (doi:10.3390/plants12233995), 2023-11-28
Supplement: s1 [file s1]

Table S3. Percent of pairwise similarity between *S. tuberosum* plastomes

|                                                        | <i>S. tuberosum</i><br>Group Tuberosum<br>cv. Nakra W | <i>S. tuberosum</i><br>Group Tuberosum<br>cv. Barin D | <i>S. tuberosum</i> Group<br>Tuberosum cv.<br>Vitelotte T | <i>S. tuberosum</i><br>Group Phureja P | <i>S. tuberosum</i><br>Group<br>Andigenum a3 A | <i>S. tuberosum</i><br>Group<br>Andigenum a4 A |
|--------------------------------------------------------|-------------------------------------------------------|-------------------------------------------------------|-----------------------------------------------------------|----------------------------------------|------------------------------------------------|------------------------------------------------|
| <i>S. tuberosum</i> Group<br>Tuberosum cv. Nakra W     |                                                       | 99.932                                                | 99.692                                                    | 99.764                                 | 99.794                                         | 99.795                                         |
| <i>S. tuberosum</i> Group<br>Tuberosum cv. Barin D     | 99.932                                                |                                                       | 99.634                                                    | 99.708                                 | 99.74                                          | 99.741                                         |
| <i>S. tuberosum</i> Group<br>Tuberosum cv. Vitelotte T | 99.692                                                | 99.634                                                |                                                           | 99.583                                 | 99.614                                         | 99.614                                         |
| <i>S. tuberosum</i> Group Phureja<br>P                 | 99.764                                                | 99.708                                                | 99.583                                                    |                                        | 99.903                                         | 99.904                                         |
| <i>S. tuberosum</i> Group<br>Andigenum a3 A            | 99.794                                                | 99.74                                                 | 99.614                                                    | 99.903                                 |                                                | 99.999                                         |
| <i>S. tuberosum</i> Group<br>Andigenum a4 A            | 99.795                                                | 99.741                                                | 99.614                                                    | 99.904                                 | 99.999                                         |                                                |
