# Supplementary material for: Comparative Study of Plastomes in Solanum tuberosum with Different Cytoplasm Types
Source: MDPI journal article supplement (doi:10.3390/plants12233995), 2023-11-28
Supplement: s1 [file s1]

Table S1. Comparison of microsatellites in the chloroplast genomes of *Solanum tuberosum* accessions

| Accession                                              | Plastome Length, bp | Total SSR Number | Total Repeats Length, bp | % of Plastome Length | SSR Number in CDS regions | Total SSR Number per type |    |     |       |       |      |
|--------------------------------------------------------|---------------------|------------------|--------------------------|----------------------|---------------------------|---------------------------|----|-----|-------|-------|------|
|                                                        |                     |                  |                          |                      |                           | Mono                      | Di | Tri | Tetra | Penta | Hexa |
| <i>S. tuberosum</i> Group<br>Tuberosum cv. Nakra W     | 155549              | 56               | 625                      | 0.4018               | 6                         | 39                        | 6  | 2   | 8     | 1     | 0    |
| <i>S. tuberosum</i> Group<br>Tuberosum cv. Vitelotte T | 155296              | 53               | 588                      | 0.3786               | 6                         | 36                        | 6  | 2   | 8     | 1     | 0    |
| <i>S. tuberosum</i> Group Phureja P                    | 155492              | 51               | 584                      | 0.3756               | 6                         | 34                        | 6  | 2   | 8     | 1     | 0    |
| <i>S. tuberosum</i> Group<br>Andigenum a3A             | 155518              | 53               | 588                      | 0.3781               | 6                         | 36                        | 6  | 2   | 8     | 1     | 0    |
| <i>S. tuberosum</i> Group<br>Andigenum a4A             | 155517              | 53               | 588                      | 0.3781               | 6                         | 36                        | 6  | 2   | 8     | 1     | 0    |
| <i>S. tuberosum</i> Group<br>Tuberosum cv. Barin D     | 155562              | 55               | 616                      | 0.3960               | 6                         | 38                        | 6  | 2   | 8     | 1     | 0    |
