# Supplementary figures and images for: Comparative Study of Plastomes in Solanum tuberosum with Different Cytoplasm Types
Source: MDPI journal article supplement (doi:10.3390/plants12233995), 2023-11-28

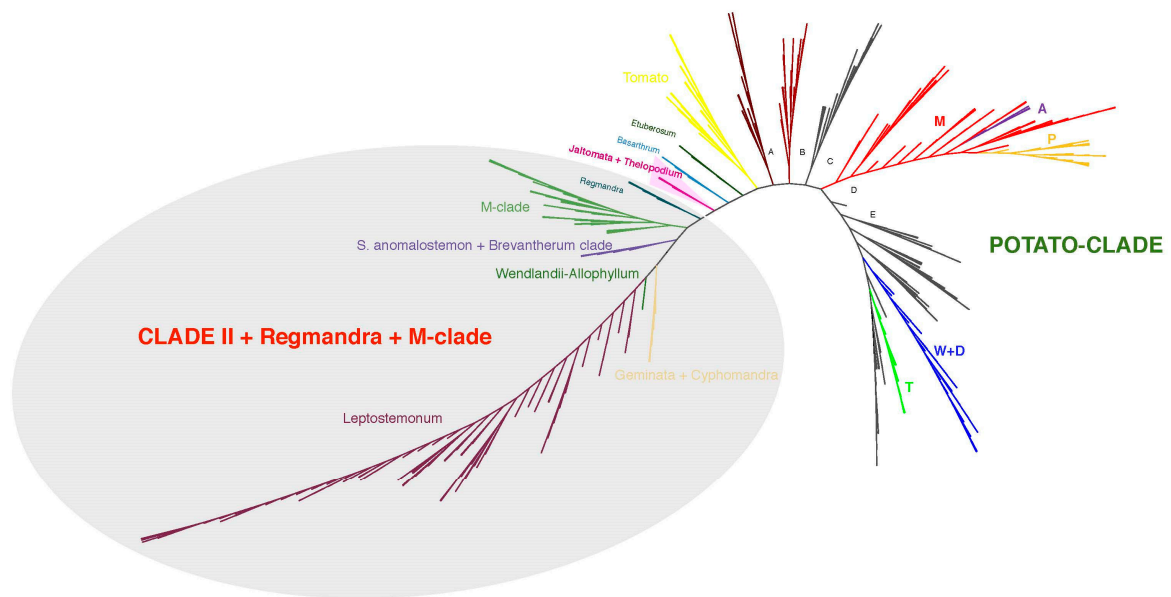

Figure S2. Unrooted phylogenetic tree of *Solanum* and *Jaltomata* plastomes.

Supplement: s1 [file s1]
